# Supplementary material
Source: PubMed Central journal article supplement (PMC1360727)

**Supplementary Figure 1:** Deconvolution of the size-exclusion spectra obtained using 24-, 20-, and 16-mer heparin. The spectra shown in figure 1B were deconvoluted into separate curves for the lower and higher molecular weight species, as described in the Experimental section. The midpoints of the deconvoluted peaks are given in Table 1. **A:** deconvolution of the FGF1-FGFR2-16mer spectrum. **B:** deconvolution of the FGF1-FGFR2-20mer spectrum. **C:** deconvolution of the FGF1-FGFR2-24mer spectrum.

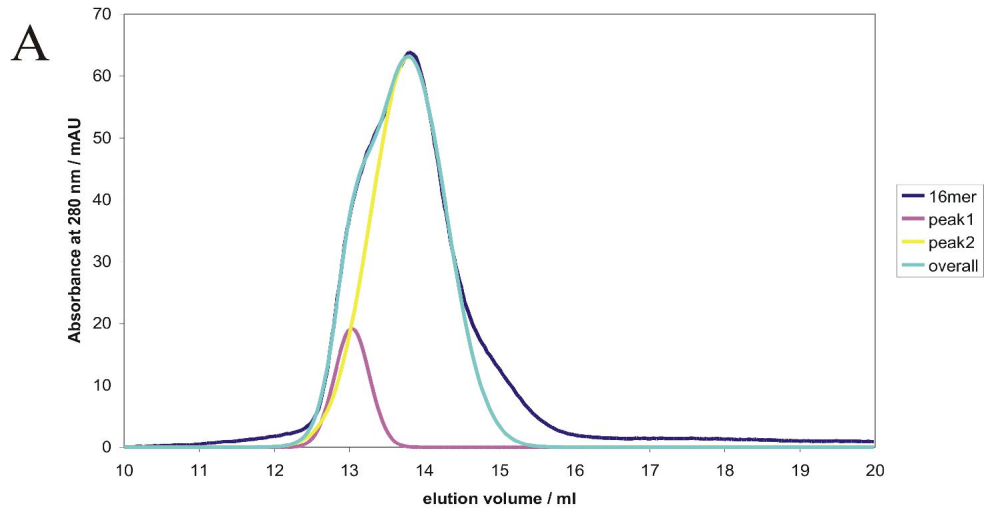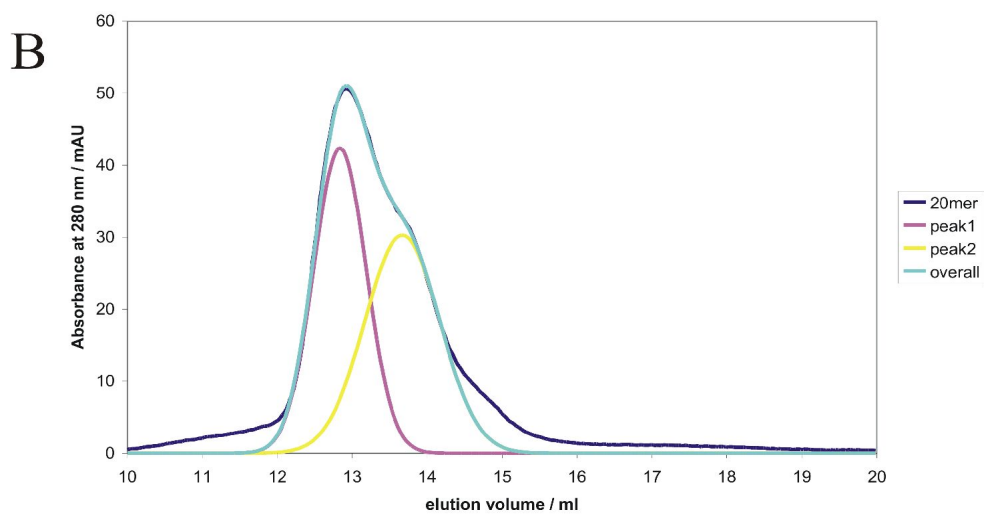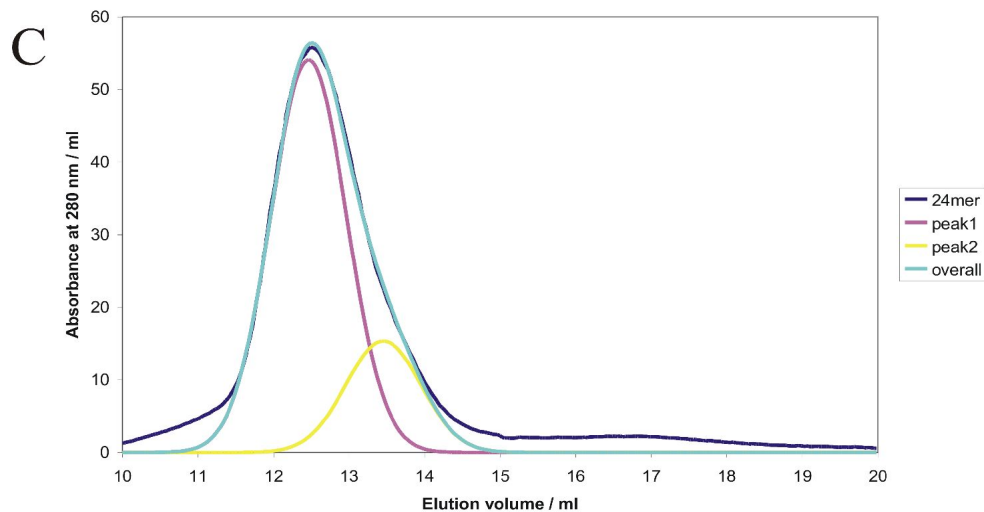

Supplement: bj3930741add.pdf [file bj3930741add.pdf]
